# Supplementary material for: Response of Macrophyte Diversity in Coastal Lakes to Watershed Land Use and Salinity Gradient
Source: MDPI journal article supplement (doi:10.3390/ijerph192416620), 2022-12-10
Supplement: s1 [file s1]

Table S2. Physico-chemical properties of water in the studied costal lakes

|                            |          | Baltic coastal lakes |            |         |             |        |        |        |        |             |           |        |
|----------------------------|----------|----------------------|------------|---------|-------------|--------|--------|--------|--------|-------------|-----------|--------|
|                            |          | Dolgie Wielkie       | Liwia Łuża | Sarbsko | Wicko Przym | Janno  | Gardno | Kopań  | Łebsko | Resko Przym | Ptasi Raj | Total  |
| Parameter                  | Type     | F                    | F          | F       | F           | F      | T      | T      | T      | T           | B         |        |
| Secchi Disk (Transparency) | Mean     | 19.60                | 29.83      | 33.43   | 31.36       | 28.18  | 38.80  | 27.67  | 32.92  | 34.73       | 77.75     | 33.76  |
|                            | N        | 30                   | 30         | 30      | 42          | 66     | 30     | 30     | 36     | 30          | 24        | 348    |
|                            | St.D.    | 4.74                 | 10.95      | 14.53   | 7.16        | 8.26   | 14.84  | 11.58  | 6.91   | 10.73       | 31.53     | 17.97  |
|                            | CI -95 % | 17.83                | 25.75      | 28.01   | 29.13       | 26.15  | 33.26  | 23.34  | 30.58  | 30.72       | 64.44     | 31.87  |
|                            | CI +95 % | 21.37                | 33.92      | 38.86   | 33.59       | 30.21  | 44.34  | 31.99  | 35.25  | 38.74       | 91.06     | 35.66  |
| Temperature                | Mean     | 16.31                | 17.84      | 15.72   | 16.62       | 16.26  | 15.66  | 16.97  | 15.82  | 16.04       | 16.03     | 16.33  |
|                            | N        | 30                   | 30         | 30      | 42          | 66     | 30     | 30     | 36     | 30          | 24        | 348    |
|                            | St.D.    | 4.94                 | 4.04       | 3.94    | 4.55        | 3.98   | 3.75   | 4.60   | 4.55   | 3.21        | 5.46      | 4.28   |
|                            | CI -95 % | 14.47                | 16.33      | 14.25   | 15.21       | 15.28  | 14.26  | 15.25  | 14.28  | 14.84       | 13.73     | 15.88  |
|                            | CI +95 % | 18.15                | 19.35      | 17.19   | 18.04       | 17.24  | 17.06  | 18.69  | 17.36  | 17.24       | 18.34     | 16.78  |
| pH                         | Mean     | 8.78                 | 8.75       | 8.52    | 8.66        | 8.80   | 8.68   | 8.97   | 8.46   | 8.83        | 7.89      | 8.66   |
|                            | N        | 30                   | 30         | 30      | 42          | 66     | 30     | 30     | 36     | 30          | 24        | 348    |
|                            | St.D.    | 0.48                 | 0.38       | 0.36    | 0.29        | 0.37   | 0.33   | 0.47   | 0.23   | 0.29        | 0.31      | 0.43   |
|                            | CI -95 % | 8.60                 | 8.61       | 8.39    | 8.57        | 8.71   | 8.55   | 8.80   | 8.39   | 8.71        | 7.75      | 8.62   |
|                            | CI +95 % | 8.95                 | 8.89       | 8.66    | 8.75        | 8.89   | 8.80   | 9.15   | 8.54   | 8.94        | 8.02      | 8.71   |
| DO%                        | Mean     | 103.44               | 124.47     | 97.95   | 104.32      | 106.30 | 99.61  | 116.97 | 87.76  | 101.40      | 86.78     | 103.32 |
|                            | N        | 30                   | 30         | 30      | 42          | 66     | 30     | 30     | 36     | 30          | 24        | 348    |
|                            | St.D.    | 19.69                | 26.25      | 27.00   | 20.51       | 16.58  | 19.13  | 19.59  | 17.95  | 25.60       | 37.55     | 24.50  |
|                            | CI -95 % | 96.09                | 114.66     | 87.87   | 97.93       | 102.22 | 92.46  | 109.66 | 81.69  | 91.84       | 70.93     | 100.73 |
|                            | CI +95 % | 110.79               | 134.27     | 108.03  | 110.71      | 110.37 | 106.75 | 124.29 | 93.84  | 110.96      | 102.64    | 105.90 |
| Salinity                   | Mean     | 0.05                 | 0.40       | 0.04    | 0.13        | 0.13   | 1.57   | 1.09   | 2.73   | 2.48        | 6.89      | 1.28   |
|                            | N        | 30                   | 30         | 30      | 42          | 66     | 30     | 30     | 36     | 30          | 24        | 348    |
|                            | St.D.    | 0.01                 | 0.24       | 0.01    | 0.06        | 0.06   | 1.83   | 0.30   | 0.73   | 1.28        | 0.71      | 1.95   |
|                            | CI -95 % | 0.04                 | 0.31       | 0.03    | 0.11        | 0.12   | 0.89   | 0.97   | 2.48   | 2.00        | 6.59      | 1.08   |
|                            | CI +95 % | 0.05                 | 0.49       | 0.04    | 0.15        | 0.15   | 2.25   | 1.20   | 2.98   | 2.95        | 7.19      | 1.49   |

|                   |             |       |       |       |       |       |       |       |       |       |       |       |
|-------------------|-------------|-------|-------|-------|-------|-------|-------|-------|-------|-------|-------|-------|
| TOC               | Mean        | 38.37 | 22.48 | 15.13 | 14.31 | 20.30 | 9.90  | 27.68 | 15.50 | 12.58 | 8.78  | 18.66 |
|                   | N           | 30    | 30    | 30    | 42    | 66    | 30    | 30    | 36    | 30    | 24    | 348   |
|                   | St.D.       | 14.08 | 13.31 | 6.88  | 4.02  | 7.05  | 3.57  | 15.08 | 4.36  | 4.53  | 3.95  | 11.60 |
|                   | CI<br>-95 % | 33.11 | 17.51 | 12.56 | 13.06 | 18.57 | 8.57  | 22.05 | 14.03 | 10.89 | 7.12  | 17.44 |
|                   | CI<br>+95 % | 43.63 | 27.45 | 17.70 | 15.57 | 22.03 | 11.23 | 33.31 | 16.98 | 14.27 | 10.45 | 19.88 |
| DOC               | Mean        | 18.12 | 14.74 | 8.68  | 10.28 | 10.23 | 6.09  | 13.82 | 8.34  | 7.23  | 5.37  | 10.34 |
|                   | N           | 30    | 30    | 30    | 42    | 66    | 30    | 30    | 36    | 30    | 24    | 348   |
|                   | St.D.       | 3.96  | 6.56  | 3.89  | 2.95  | 3.89  | 2.95  | 6.95  | 3.56  | 2.79  | 2.38  | 5.46  |
|                   | CI<br>-95 % | 16.64 | 12.29 | 7.23  | 9.36  | 9.28  | 4.99  | 11.23 | 7.14  | 6.19  | 4.37  | 9.76  |
|                   | CI<br>+95 % | 19.60 | 17.19 | 10.14 | 11.20 | 11.19 | 7.19  | 16.42 | 9.55  | 8.27  | 6.37  | 10.91 |
| N-NO <sub>3</sub> | Mean        | 0.34  | 0.58  | 0.61  | 0.66  | 0.84  | 0.85  | 0.85  | 0.73  | 0.98  | 1.03  | 0.75  |
|                   | N           | 30    | 30    | 30    | 42    | 66    | 30    | 30    | 36    | 30    | 24    | 348   |
|                   | St.D.       | 0.17  | 0.48  | 0.36  | 0.52  | 0.91  | 0.56  | 0.66  | 0.54  | 0.92  | 0.71  | 0.67  |
|                   | CI<br>-95 % | 0.28  | 0.40  | 0.48  | 0.50  | 0.62  | 0.64  | 0.60  | 0.54  | 0.64  | 0.73  | 0.68  |
|                   | CI<br>+95 % | 0.40  | 0.76  | 0.75  | 0.82  | 1.07  | 1.06  | 1.10  | 0.91  | 1.32  | 1.33  | 0.82  |
| N-NH <sub>4</sub> | Mean        | 0.24  | 0.57  | 0.16  | 0.18  | 0.40  | 0.43  | 0.13  | 0.35  | 0.35  | 0.38  | 0.32  |
|                   | N           | 30    | 30    | 30    | 42    | 66    | 30    | 30    | 36    | 30    | 24    | 348   |
|                   | St.D.       | 0.13  | 0.43  | 0.09  | 0.14  | 0.33  | 0.36  | 0.09  | 0.23  | 0.44  | 0.28  | 0.31  |
|                   | CI<br>-95 % | 0.19  | 0.41  | 0.13  | 0.13  | 0.32  | 0.30  | 0.10  | 0.27  | 0.19  | 0.26  | 0.29  |
|                   | CI<br>+95 % | 0.29  | 0.73  | 0.20  | 0.22  | 0.48  | 0.57  | 0.16  | 0.43  | 0.52  | 0.50  | 0.35  |
| P-PO <sub>4</sub> | Mean        | 0.10  | 0.11  | 0.11  | 0.18  | 0.55  | 0.05  | 0.15  | 0.04  | 0.15  | 0.30  | 0.21  |
|                   | N           | 30    | 30    | 30    | 42    | 66    | 30    | 30    | 36    | 30    | 24    | 348   |
|                   | St.D.       | 0.04  | 0.09  | 0.12  | 0.08  | 0.29  | 0.03  | 0.07  | 0.02  | 0.10  | 0.14  | 0.23  |
|                   | CI<br>-95 % | 0.08  | 0.07  | 0.06  | 0.15  | 0.48  | 0.04  | 0.12  | 0.04  | 0.11  | 0.24  | 0.18  |
|                   | CI<br>+95 % | 0.11  | 0.14  | 0.15  | 0.20  | 0.62  | 0.06  | 0.17  | 0.05  | 0.18  | 0.36  | 0.23  |
| TP                | Mean        | 0.31  | 0.49  | 0.33  | 0.48  | 0.87  | 0.16  | 0.35  | 0.28  | 0.40  | 0.57  | 0.47  |
|                   | N           | 30    | 30    | 30    | 42    | 66    | 30    | 30    | 36    | 30    | 24    | 348   |
|                   | St.D.       | 0.11  | 0.38  | 0.30  | 0.25  | 0.60  | 0.08  | 0.18  | 0.14  | 0.21  | 0.29  | 0.40  |
|                   | CI<br>-95 % | 0.27  | 0.35  | 0.21  | 0.40  | 0.72  | 0.13  | 0.28  | 0.23  | 0.32  | 0.44  | 0.42  |
|                   | CI<br>+95 % | 0.35  | 0.64  | 0.44  | 0.56  | 1.02  | 0.19  | 0.42  | 0.33  | 0.48  | 0.69  | 0.51  |
