# Supplementary material for: Response of Macrophyte Diversity in Coastal Lakes to Watershed Land Use and Salinity Gradient
Source: MDPI journal article supplement (doi:10.3390/ijerph192416620), 2022-12-10
Supplement: s1 [file s1]

**Table S1.** Overview of geographical locations and morphological features of the studied coastal lakes. Morphometrical data source is reference 64. The catchment data listed in the table come from GIS-based measurements by authors.

| Lake/Feature                                       | Ptasi Raj                                                                                          | Resko Przymorskie                                                  | Łebsko                                                         | Gardno                                                           | Kopań                                    | Liwia Łuża                                                    | Wicko Przymorskie                                             | Sarbsko                                                       | Jamno                            | Dolgie Wielkie                                                |
|----------------------------------------------------|----------------------------------------------------------------------------------------------------|--------------------------------------------------------------------|----------------------------------------------------------------|------------------------------------------------------------------|------------------------------------------|---------------------------------------------------------------|---------------------------------------------------------------|---------------------------------------------------------------|----------------------------------|---------------------------------------------------------------|
| Saline type of lakes                               | Brackish                                                                                           | Transitional                                                       |                                                                |                                                                  |                                          | Freshwater                                                    |                                                               |                                                               |                                  |                                                               |
| Geographic coordinates                             | 54°22' N<br>18°48' E                                                                               | 54°09' N.<br>15°21' E                                              | 54°43' N.<br>17°25' E                                          | 54°39' N.<br>17°07' E                                            | 54°29' N.<br>16°27' E                    | 54°05' N.<br>15°05' E                                         | 54°33' N.<br>16°38' E                                         | 54°46' N<br>18°38' E                                          | 54°17' N.<br>16°08' E            | 54°42' N.<br>17°12' E                                         |
| Water table area (ha)                              | 53                                                                                                 | 577                                                                | 7040                                                           | 2338                                                             | 786                                      | 211                                                           | 1058                                                          | 651                                                           | 2196                             | 136                                                           |
| Mean depth (m)                                     | 2.6                                                                                                | 2.5                                                                | 4.7                                                            | 2.2                                                              | 3.9                                      | 0.9                                                           | 6.1                                                           | 1.2                                                           | 3.8                              | 2.7                                                           |
| Volume (hm <sup>3</sup> )                          | 0.7                                                                                                | 7.7                                                                | 113.5                                                          | 31.3                                                             | 11.7                                     | 1.9                                                           | 28.5                                                          | 7.8                                                           | 38.3                             | 1.9                                                           |
| <b>Catchment area (ha):</b>                        |                                                                                                    |                                                                    |                                                                |                                                                  |                                          |                                                               |                                                               |                                                               |                                  |                                                               |
| <b>Total</b>                                       | 410.1                                                                                              | 312 51.4                                                           | 156 887.4                                                      | 92 981.7                                                         | 3 701.8                                  | 18 465.5                                                      | 10 928.8                                                      | 19 359.7                                                      | 47 260.5                         | 617.5                                                         |
| Lake area/<br>Total catchment area (%)             | 12.9                                                                                               | 1.8                                                                | 4.5                                                            | 2.5                                                              | 21.2                                     | 1.1                                                           | 9.7                                                           | 3.4                                                           | 4.6                              | 22.0                                                          |
| <b>Direct</b>                                      | 410.1                                                                                              | 1257.7                                                             | 12529.9                                                        | 4220.8                                                           | 2220.2                                   | 517.1                                                         | 2031.5                                                        | 1296.2                                                        | 3105.6                           | 617.5                                                         |
| Lake area/<br>Direct catchment area (%)            | 12.9                                                                                               | 45.9                                                               | 56.2                                                           | 55.4                                                             | 35.4                                     | 40.8                                                          | 52.1                                                          | 50.2                                                          | 70.7                             | 22.0                                                          |
| Direct catchment area<br>/Total catchment area (%) | 100                                                                                                | 4                                                                  | 8                                                              | 5                                                                | 60                                       | 3                                                             | 19                                                            | 7                                                             | 7                                | 100                                                           |
| Hydrological connectivity                          | Permanent intrusion of seawater through Wisła Śmiała River channel and/or directly from Gdańsk Bay | Periodical seawater intrusion by a natural canal of Błotnica River | Periodical seawater intrusion by a natural canal of Łeba River | Periodical seawater intrusion by a natural canal of Łupawa River | Periodical seawater intrusion by a canal | Naturally isolated from the sea. No hydrological connectivity | Naturally isolated from the sea. No hydrological connectivity | Naturally isolated from the sea. No hydrological connectivity | Isolated from sea by a floodgate | Naturally isolated from the sea. No hydrological connectivity |
