# Supplementary material for: Response of Macrophyte Diversity in Coastal Lakes to Watershed Land Use and Salinity Gradient
Source: MDPI journal article supplement (doi:10.3390/ijerph192416620), 2022-12-10
Supplement: s1 [file s1]

Table S3. List of macrophyte communities of coastal lakes in the Baltic Sea. Asterix denotes marine species

| Ecological groups |             | Community                           | Type of coastal lakes |                    |                   |        |        |                  |            |                   |         |       |
|-------------------|-------------|-------------------------------------|-----------------------|--------------------|-------------------|--------|--------|------------------|------------|-------------------|---------|-------|
|                   |             |                                     | Brackish              | Transitional lakes |                   |        |        | Freshwater lakes |            |                   |         |       |
|                   |             |                                     |                       | Ptasi Raj          | Resko Przymorskie | Łebsko | Gardno | Kopań            | Liwia Łuża | Wicko Przymorskie | Sarbsko | Jamno |
| Submerged         | Charophytes | <i>Nitellopsis obtusae</i>          | 5*                    |                    | 1                 |        |        |                  |            |                   |         |       |
|                   |             | <i>Chara canescens</i> *            | 5                     |                    |                   |        |        |                  |            |                   |         |       |
|                   |             | <i>Chara fragilis</i>               | 2                     |                    |                   |        |        |                  |            |                   |         |       |
|                   |             | <i>Chara contraria</i>              | 2                     |                    |                   |        |        |                  |            |                   |         |       |
|                   |             | <i>Chara aspera</i>                 |                       |                    |                   | 1      |        |                  |            |                   |         |       |
|                   | Elodeides   | <i>Myriophyllum spicatum</i>        | 3                     | 3                  | 1                 | 3      | 7      |                  | 3          | 5                 | 2       |       |
|                   |             | <i>Potamogeton pectinatus</i>       | 7                     | 3                  |                   | 1      |        |                  |            | 3                 | 2       |       |
|                   |             | <i>Potamogeton perfoliatus</i>      |                       | 3                  | 1                 | 2      |        |                  | 2          | 5                 | 2       |       |
|                   |             | <i>Ceratophyllum demersum</i>       | 2                     |                    |                   | 1      |        | 1                |            |                   |         |       |
|                   |             | <i>Najas marina</i>                 |                       |                    | 3                 |        |        |                  |            |                   |         |       |
|                   |             | <i>Potamogeton lucens</i>           |                       |                    | 1                 |        |        | 1                | 1          |                   |         |       |
|                   |             | <i>Potamogeton crispus</i>          |                       | 1                  |                   |        |        |                  |            |                   | 1       |       |
|                   |             | <i>Elodea canadensis</i>            |                       |                    |                   | 1      |        |                  |            |                   |         |       |
|                   |             | <i>Utricularia vulgaris</i> *       |                       |                    |                   |        | 1      |                  |            |                   |         |       |
|                   | Nymphaeids  | <i>Nuphar lutea</i>                 |                       | 2                  | 3                 | 3      |        | 5                | 2          | 1                 |         | 5     |
|                   |             | <i>Nymphaea</i> sp.                 |                       |                    | 2                 |        |        |                  | 1          |                   |         | 7     |
|                   |             | <i>Polygonum amphibium f.natans</i> |                       |                    | 2                 |        |        |                  |            |                   | 1       | 2     |



|                                                              |      |                         |      |      |      |      |      |      |      |      |
|--------------------------------------------------------------|------|-------------------------|------|------|------|------|------|------|------|------|
|                                                              |      | <i>Comarum palustre</i> |      |      |      |      |      |      |      | 2    |
|                                                              |      | <i>Rorippa amphibia</i> |      |      |      |      |      |      | 1    |      |
|                                                              |      | <i>Carex acuta</i>      |      | 3    |      |      |      |      |      |      |
|                                                              |      | <i>Carex riparia</i>    |      |      |      |      |      |      |      | 2    |
| <b>Macrophyte characteristics</b>                            |      |                         |      |      |      |      |      |      |      |      |
| No of communities (S)                                        | 8    | 18                      | 23   | 19   | 10   | 13   | 13   | 18   | 20   | 17   |
| Biodiversity, Shannon-Wiener index (H')                      | 1.42 | 0.91                    | 1.64 | 1.13 | 1.12 | 1.07 | 0.73 | 2.89 | 0.47 | 2.10 |
| Evenness, Pielou Index (J')                                  | 0.68 | 0.31                    | 0.52 | 0.38 | 0.49 | 0.42 | 0.29 | 0.60 | 0.16 | 0.60 |
| Vegetation coverage (C <sub>max</sub> )                      | 2.5  | 0.8                     | 1.4  | 1.2  | 1.5  | 1.0  | 1.5  | 1.5  | 1.2  | 1.5  |
| Share of the phytolittoral area in the total lake area (N,%) | 62.5 | 5.1                     | 23.8 | 13.7 | 35.5 | 13.7 | 19.9 | 44.4 | 13.2 | 30.4 |
| Colonisation index (Z)                                       | 0.70 | 0.05                    | 0.27 | 0.14 | 0.36 | 0.14 | 0.32 | 0.46 | 0.18 | 0.36 |
| Share of Charophytes (%)                                     | 23.3 | 0.0                     | 0.0  | <0.1 | 0.0  | 0.0  | 0.0  | 0.0  | 0.0  | 0.0  |
| Share of Nympheides (%)                                      | 0.0  | 0.3                     | 4.3  | 1.7  | <0.1 | 12.0 | 0.6  | 0.1  | 0.2  | 26.1 |
| Share of Emerged (%)                                         | 47.5 | 95.2                    | 88.2 | 96.5 | 70.0 | 87.9 | 96.1 | 55.8 | 98.5 | 73.9 |
| Share of Submerged (%)                                       | 52.5 | 4.8                     | 1.8  | 3.5  | 30.0 | 12.1 | 3.9  | 44.2 | 1.5  | 26.1 |
| Submerged / Emerged (%)                                      | 1.1  | 19.8                    | 49.0 | <0.1 | 2.3  | 7.3  | 24.6 | 1.3  | <0.1 | 0.4  |
| Share of marine communities (%)                              | 11.7 | 0.5                     | 3.0  | 0.7  | 0.1  | 0.5  | 0.0  | 0.1  | 0.3  | 0.0  |

\*Percentage area coverage: 9>75%; 8=50-75%; 7=25-50%; 6=10-25%; 5=5-10%; 4=2.5-5%; 3=1-2.5%; 2=0.1-1%; 1=<0.1%
